# Supplementary material
Source: PubMed Central journal article supplement (PMC4305177)
Supplement: mmc1.pdf [file mmc1.pdf]

**A**

Step 1. Amplification of regions of interest

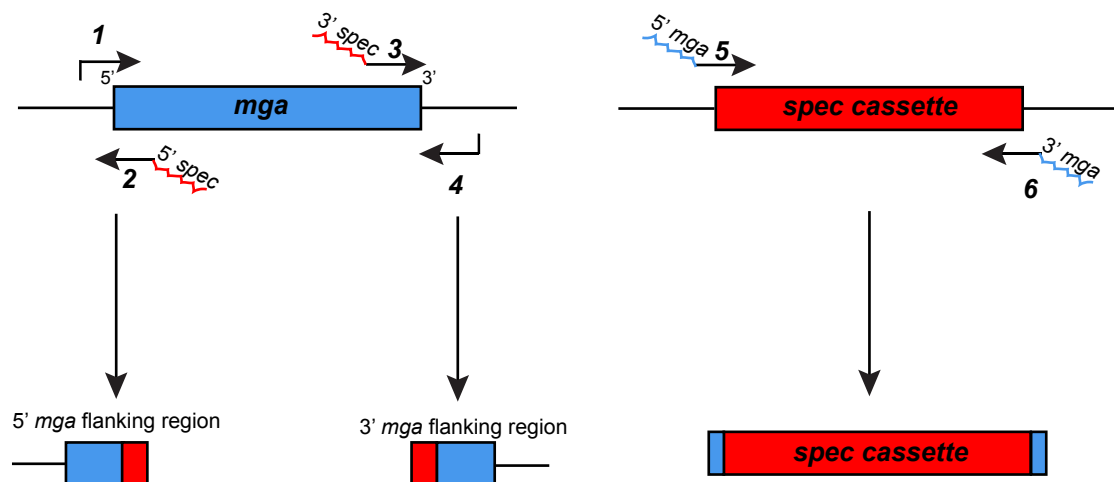

Step 2. Ligation of amplified products

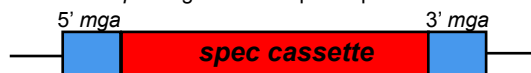Step 3. Gene disruption construct is cloned into *E. coli* vector and linearized by digestion with *XmnI*

Step 4. Electroporation into GAS competent cell

Step 5. Selection of mutant GAS by growth in spectinomycin containing media and confirmation of gene disruption with Sanger sequencing

**B**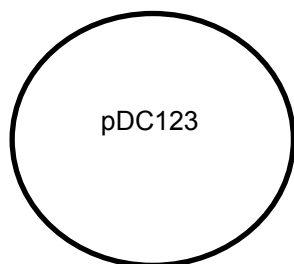*mga*-deficient strain ( $\Delta$ *mga*)**C**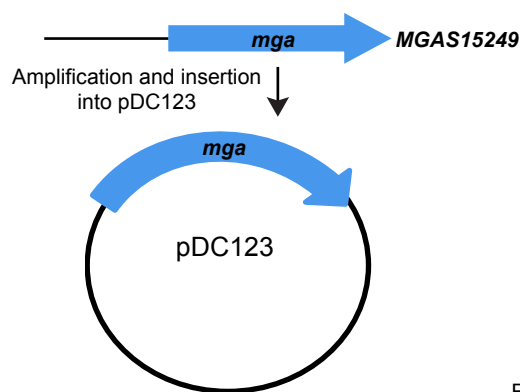Extra-chromosomal copy of wild-type *mga***D**

Site-directed mutagenesis to introduce the H201R replacement

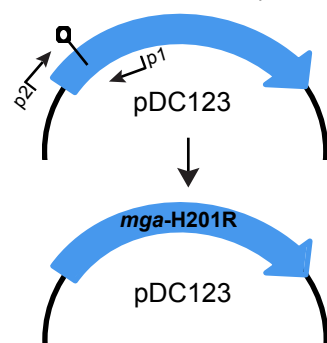Extra-chromosomal copy of *mga* encoding the H201R amino acid replacement
